# Supplementary material
Source: PubMed Central journal article supplement (PMC8719352)
Supplement: NIHMS1765106-supplement-1.pdf [file NIHMS1765106-supplement-1.pdf]

**Table S1. Local Criteria for Diagnosis of Chronic Kidney Disease (CKD)\***

|                                                                                                                                                                                                                                                                                                |                                                                                                                                                                                                                                                                                                               |
|------------------------------------------------------------------------------------------------------------------------------------------------------------------------------------------------------------------------------------------------------------------------------------------------|---------------------------------------------------------------------------------------------------------------------------------------------------------------------------------------------------------------------------------------------------------------------------------------------------------------|
| CKD is defined by the presence of functional or structural alteration of the kidney, with or without reduction in glomerular filtration rate, for greater than 3 months. Renal alterations are ascertained by either of the following criteria, evidenced on blood, urine, or imaging studies: |                                                                                                                                                                                                                                                                                                               |
| Markers of Kidney Damage                                                                                                                                                                                                                                                                       | <ul style="list-style-type: none"><li>) Elevated albuminuria</li><li>) Alterations in Urine Sedimentation</li><li>) Electrolyte imbalance or other alterations of tubular origin</li><li>) Structural histologic alterations</li><li>) Structural alterations on imaging</li><li>) Renal transplant</li></ul> |
| Reduced Glomerular Filtration Rate                                                                                                                                                                                                                                                             | <60mL/min/1.73m <sup>2</sup>                                                                                                                                                                                                                                                                                  |

\*Assessed and reported by hospital physicians at the study site

**Table S2. Local Spanish language terms\* and their English Interpretations for this Analysis**

|                                  |                                                                            |
|----------------------------------|----------------------------------------------------------------------------|
| Chronic kidney disease (CKD)     | <i>Enfermedad Renal Crónica (ERC) or Insuficiencia Renal Crónica (IRC)</i> |
| Glomerular Filtration Rate (GFR) | <i>Tasa de Filtración Glomerular (TFG)</i>                                 |
| paresthesia                      | <i>hormigos or sensación de fogaço</i>                                     |

\*Reported by hospital physicians at the study site

**Table S3. Characteristics of Study Population (N=586)**

|                                             | N   | No CKD n(%)<br>537 (91.6%) | CKD n(%)<br>49 (8.4%) | ALL         | p-value |
|---------------------------------------------|-----|----------------------------|-----------------------|-------------|---------|
| <b>Demographics</b>                         |     |                            |                       |             |         |
| Residence                                   |     |                            |                       |             |         |
| Chichigalpa                                 | 565 | 345 (64.7%)                | 34 (69.4%)            | 379 (65.1%) | 0.512   |
| Other                                       |     | 188 (35.3%)                | 15 (30.6%)            | 203 (34.9%) |         |
| Working at the time of Symptom Onset        |     |                            |                       |             |         |
| No                                          | 231 | 75 (34.7%)                 | 4 (26.7%)             | 79 (34.2%)  | 0.589   |
| Yes                                         |     | 141 (65.3%)                | 11 (73.3%)            | 152 (65.8%) |         |
| Works in contact with Soil                  |     |                            |                       |             |         |
| No                                          | 586 | 60 (11.2%)                 | 4 (8.2%)              | 64 (10.9%)  | 0.638   |
| Yes                                         |     | 477 (88.8%)                | 45 (91.8%)            | 522 (89.1%) |         |
| Works in contact with Water                 |     |                            |                       |             |         |
| No                                          | 585 | 433 (80.8%)                | 37 (75.5%)            | 470 (80.3%) | 0.374   |
| Yes                                         |     | 103 (19.2%)                | 12 (24.5%)            | 115 (19.7%) |         |
| <b>Health History</b>                       |     |                            |                       |             |         |
| Has Ever Used                               |     |                            |                       |             |         |
| Unregulated Local Alcohol ( <i>Lija</i> )   | 565 | 56 (10.9%)                 | 6 (12.2%)             | 62 (11%)    | 0.766   |
| Traditional/Herbal Medicines                | 554 | 67 (13.2%)                 | 3 (6.5%)              | 70 (12.6%)  | 0.249   |
| Illicit Drugs                               | 560 | 40 (7.8%)                  | 4 (8.5%)              | 44 (7.9%)   | 0.779   |
| Blood Group                                 |     |                            |                       |             |         |
| O                                           | 294 | 192 (72.5%)                | 21 (72.4%)            | 213 (72.5%) | 0.854   |
| A                                           |     | 52 (19.6%)                 | 7 (24.1%)             | 59 (20.1%)  |         |
| B                                           |     | 17 (6.4%)                  | 1 (3.5%)              | 18 (6.1%)   |         |
| AB                                          |     | 4 (1.5%)                   | 0 (0%)                | 4 (1.4%)    |         |
| Rh Factor                                   |     |                            |                       |             |         |
| Rh-                                         | 293 | 7 (2.7%)                   | 0 (0%)                | 7 (2.4%)    | 1.000   |
| Rh+                                         |     | 257 (97.4%)                | 29 (100%)             | 286 (97.6%) |         |
| <b>Clinical Presentation and Management</b> |     |                            |                       |             |         |
| Normotensive (<130/90 mmHg)                 |     |                            |                       |             |         |
| No                                          | 577 | 50 (9.5%)                  | 4 (8.2%)              | 54 (9.4%)   | 1.000   |
| Yes                                         |     | 478 (90.5%)                | 45 (91.8%)            | 523 (90.6%) |         |
| Admitted to Hospital                        |     |                            |                       |             |         |
| No                                          | 581 | 34 (6.4%)                  | 3 (6.1%)              | 37 (6.4%)   | 1.000   |
| Yes                                         |     | 498 (93.6%)                | 46 (93.9%)            | 544 (93.6%) | 0.000   |
| Taken Off Work                              |     |                            |                       |             |         |
| No                                          | 581 | 19 (3.6%)                  | 0 (0%)                | 19 (3.3%)   | 0.393   |
| Yes                                         |     | 513 (96.4%)                | 49 (100%)             | 562 (96.7%) | 0.000   |
| Patient Self-Treated prior to Presentation  |     |                            |                       |             |         |
| No                                          | 423 | 217 (55.6%)                | 18 (54.6%)            | 235 (55.6%) | 1.000   |
| Yes                                         |     | 173 (44.4%)                | 15 (45.5%)            | 188 (44.4%) |         |
| Patient Self-Treatment Type                 |     |                            |                       |             |         |
| Fluids/Electrolytes                         | 431 | 37 (9.3%)                  | 7 (20.6%)             | 44 (10.2%)  | 0.037   |
| Antibiotic                                  | 425 | 16 (4.1%)                  | 2 (6.1%)              | 18 (4.2%)   | 0.642   |
| Acetaminophen                               | 427 | 15 (3.8%)                  | 0 (0%)                | 15 (3.5%)   | 0.618   |
| NSAID                                       | 427 | 15 (3.8%)                  | 0 (0%)                | 15 (3.5%)   | 0.618   |
| Ranitidine                                  | 426 | 2 (0.5%)                   | 0 (0%)                | 2 (0.5%)    | 1.000   |
| Treatment Administered in Hospital          |     |                            |                       |             |         |
| Fluids/Electrolytes                         | 582 | 488 (91.6%)                | 45 (91.8%)            | 533 (91.6%) | 1.000   |
| Alopurinol                                  | 577 | 16 (3%)                    | 5 (10.2%)             | 21 (3.6%)   | 0.026   |
| Acetaminophen                               | 577 | 30 (5.7%)                  | 1 (2%)                | 31 (5.4%)   | 0.504   |
| Ranitidine                                  | 577 | 29 (5.5%)                  | 3 (6.1%)              | 32 (5.6%)   | 0.747   |
| <b>Body Mass Index (BMI)</b>                |     |                            |                       |             |         |

|                                        |     |                   |                       |                   |                |
|----------------------------------------|-----|-------------------|-----------------------|-------------------|----------------|
| Underweight (<18.5)                    | 564 | 10 (1.9%)         | 0 (0%)                | 10 (1.8%)         | 0.339          |
| Normal (18.5-24.9)                     |     | 269 (51.8%)       | 30 (66.7%)            | 299 (53%)         |                |
| Overweight (25-29.9)                   |     | 177 (34.1%)       | 11 (24.4%)            | 188 (33.3%)       |                |
| Obese (≥30)                            |     | 63 (12.1%)        | 4 (8.9%)              | 67 (11.9%)        |                |
| <b>Baseline Renal Function</b>         |     |                   |                       |                   |                |
| CrCl at Healthy Baseline (mL/min)      |     |                   |                       |                   |                |
| ≥120                                   | 498 | 103 (22.7%)       | 7 (15.6%)             | 110 (22.1%)       | 0.029          |
| 90-<120                                |     | 217 (47.9%)       | 15 (33.3%)            | 232 (46.6%)       |                |
| 60-<90                                 |     | 130 (28.7%)       | 23 (51.1%)            | 153 (30.7%)       |                |
| <60                                    |     | 3 (0.7%)          | 0 (0%)                | 3 (0.6%)          |                |
| eGFR (CKD-Epi) at Healthy Baseline     |     |                   |                       |                   |                |
| ≥120                                   | 514 | 60 (12.8%)        | 1 (2.2%)              | 61 (11.9%)        | 0.057          |
| 90-<120                                |     | 247 (52.7%)       | 22 (48.9%)            | 269 (52.3%)       |                |
| 60-<90                                 |     | 160 (34.1%)       | 22 (48.9%)            | 182 (35.4%)       |                |
| <60                                    |     | 2 (0.4%)          | 0 (0%)                | 2 (0.4%)          |                |
| eGFR (MDRD) at Healthy Baseline        |     |                   |                       |                   |                |
| ≥120                                   | 514 | 17 (3.6%)         | 1 (2.2%)              | 18 (3.5%)         | 0.334          |
| 90-<120                                |     | 161 (34.3%)       | 12 (26.7%)            | 173 (33.7%)       |                |
| 60-<90                                 |     | 283 (60.3%)       | 30 (66.7%)            | 313 (60.9%)       |                |
| <60                                    |     | 8 (1.7%)          | 2 (4.4%)              | 10 (2%)           |                |
|                                        |     | <b>N</b>          | <b>Median (Range)</b> |                   | <b>p-value</b> |
| Symptomatic Days before Hospital Visit | 506 | 2 (0, 95)         | 2 (0, 25)             | 2 (0, 95)         | 1.000          |
| Number of Years with Current Employer  | 532 | 5.5 (0, 40)       | 8 (1, 36)             | 6 (0, 40)         | 0.044          |
| <b>Vital Signs</b>                     |     |                   |                       |                   |                |
| Height (m)                             | 578 | 1.67 (1.13, 1.91) | 1.67 (1.45, 1.8)      | 1.67 (1.13, 1.91) | 1.000          |
| Weight (kg)                            | 566 | 67.7 (45, 120)    | 66 (45.4, 91.8)       | 67.15 (45, 120)   | 0.483          |
| Blood Pressure (mmHg)                  |     |                   |                       |                   |                |
| Systolic                               | 577 | 110 (80, 180)     | 110 (80, 180)         | 110 (80, 180)     | 1.000          |
| Diastolic                              | 577 | 70 (60, 120)      | 70 (60, 120)          | 70 (60, 120)      | 1.000          |
| Pulse Rate (beats per minute)          | 559 | 80 (54, 130)      | 80 (52, 110)          | 80 (52, 130)      | 1.000          |

| <b>Table S4. Supplemental Laboratory Findings - Blood Chemistry &amp; Hematology</b> |                        |          |                    |                       |                   |                |
|--------------------------------------------------------------------------------------|------------------------|----------|--------------------|-----------------------|-------------------|----------------|
|                                                                                      |                        | <b>N</b> | <b>No CKD n(%)</b> | <b>CKD n(%)</b>       | <b>ALL</b>        | <b>p-value</b> |
| <b>Creatinine (mg/dL)</b>                                                            |                        |          |                    |                       |                   |                |
| Normal                                                                               | ≤1.3 male, ≤1.1 female | 586      | 19 (3.5%)          | 2 (4.1%)              | 21 (3.6%)         | 0.692          |
| Elevated                                                                             | >1.3 male, >1.1 female |          | 518 (96.5%)        | 47 (95.9%)            | 565 (96.4%)       |                |
| <b>Lymphopenia (&lt;21%)</b>                                                         |                        |          |                    |                       |                   |                |
| No                                                                                   |                        | 581      | 252 (47.2%)        | 28 (59.6%)            | 280 (48.2%)       | 0.103          |
| Yes                                                                                  |                        |          | 282 (52.8%)        | 19 (40.4%)            | 301 (51.8%)       |                |
| <b>Monocytosis (&gt;6%)</b>                                                          |                        |          |                    |                       |                   |                |
| No                                                                                   |                        | 528      | 477 (98.8%)        | 45 (100%)             | 522 (98.9%)       | 1.000          |
| Yes                                                                                  |                        |          | 6 (1.2%)           | 0 (0%)                | 6 (1.1%)          |                |
| <b>Thrombocytopenia (&lt;150,000 cells/mm<sup>3</sup>)</b>                           |                        |          |                    |                       |                   |                |
| No                                                                                   |                        | 527      | 483 (99.8%)        | 43 (100%)             | 526 (99.8%)       | 1.000          |
| Yes                                                                                  |                        |          | 1 (0.2%)           | 0 (0%)                | 1 (0.2%)          |                |
| <b>Low MCV (&lt;76 um<sup>3</sup>)</b>                                               |                        |          |                    |                       |                   |                |
| No                                                                                   |                        | 7        | 3 (100%)           | 2 (50%)               | 5 (71.4%)         | 0.429          |
| Yes                                                                                  |                        |          | 0 (0%)             | 2 (50%)               | 2 (28.6%)         |                |
| <b>Low MCH (&lt;27 pg)</b>                                                           |                        |          |                    |                       |                   |                |
| No                                                                                   |                        | 7        | 2 (66.7%)          | 2 (50%)               | 4 (57.1%)         | 1.000          |
| Yes                                                                                  |                        |          | 1 (33.3%)          | 2 (50%)               | 3 (42.9%)         |                |
| <b>Low MCHC (&lt;30 g/dL)</b>                                                        |                        |          |                    |                       |                   |                |
| No                                                                                   |                        | 7        | 2 (66.7%)          | 4 (100%)              | 6 (85.7%)         | 0.429          |
| Yes                                                                                  |                        |          | 1 (33.3%)          | 0 (0%)                | 1 (14.3%)         |                |
| <b>Malaria Test</b>                                                                  |                        |          |                    |                       |                   |                |
| No parasites observed                                                                |                        | 394      | 361 (99.2%)        | 30 (100%)             | 391 (99.2%)       | 1.000          |
| Parasitemia                                                                          |                        |          | 3 (0.8%)           | 0 (0%)                | 3 (0.8%)          |                |
| <b>Glucose (mg/dL)</b>                                                               |                        |          |                    |                       |                   |                |
| Normal                                                                               | ≤115                   | 555      | 452 (88.8%)        | 42 (91.3%)            | 494 (89.0%)       | 0.603          |
| High                                                                                 | >115                   |          | 57 (11.2%)         | 4 (8.7%)              | 61 (11.0%)        |                |
| <b>Urea (mg/dL)</b>                                                                  |                        |          |                    |                       |                   |                |
| Normal                                                                               | ≤50                    | 211      | 147 (74.2%)        | 10 (76.9%)            | 157 (74.4%)       | 1.000          |
| Elevated                                                                             | >50                    |          | 51 (25.8%)         | 3 (23.1%)             | 54 (25.6%)        |                |
| <b>C-Reactive Protein (mg/dL)</b>                                                    |                        |          |                    |                       |                   |                |
| Negative                                                                             | <6                     | 212      | 46 (23.1%)         | 5 (38.5%)             | 51 (24.1%)        | 0.311          |
| Positive                                                                             | ≥6                     |          | 153 (76.9%)        | 8 (61.5%)             | 161 (75.9%)       |                |
| <b>Erythrocyte Sedimentation Rate (ESR) (mm/hr)</b>                                  |                        |          |                    |                       |                   |                |
| Normal                                                                               | ≤9                     | 20       | 6 (35.3%)          | 3 (100%)              | 9 (45%)           | 0.074          |
| High                                                                                 | >9                     |          | 11 (64.7%)         | 0 (0%)                | 11 (55%)          |                |
|                                                                                      |                        | <b>N</b> |                    | <b>Median (Range)</b> |                   | <b>p-value</b> |
| Monocytes (%)                                                                        |                        | 528      | 0 (0, 9)           | 0 (0, 6)              | 0 (0, 9)          | n/a            |
| Eosinophils (%)                                                                      |                        | 564      | 0 (0, 18)          | 0 (0, 11)             | 0 (0, 18)         | n/a            |
| Platelets (count/mm <sup>3</sup> )                                                   |                        | 527      | 305000             | 321000                | 305000            | 0.215          |
| Glucose (mg/dL)                                                                      |                        | 555      | (130000, 598000)   | (210000, 510000)      | (130000, 598000)  | 0.536          |
| Urea (mg/dL)                                                                         |                        | 211      | 89 (55, 464)       | 90.5 (64, 138)        | 9 (55, 464)       | 0.154          |
| Calcium, Ionized (mmol/L)                                                            |                        | 564      | 42 (10, 102)       | 48 (30.1, 83)         | 43 (10, 102)      | 1.000          |
| Magnesium (mg/dL)                                                                    |                        | 536      | 1.17 (0.40, 1.43)  | 1.17 (0.98, 1.30)     | 1.17 (0.40, 1.43) | 0.147          |
| Potassium (mmol/L)                                                                   |                        | 573      | 2.0 (0.5, 4.1)     | 1.85 (0.8, 3.2)       | 1.99 (0.5, 4.1)   | 0.429          |
| Sodium (mmol/L)                                                                      |                        | 564      | 3.7 (1.3, 5.6)     | 3.8 (2.1, 5.5)        | 3.8 (1.3, 5.6)    | 1.000          |
| Creatine Phosphokinase (CPK) (u/L)                                                   |                        | 473      | 138 (111, 149)     | 138 (125, 144)        | 138 (111, 149)    | 0.825          |
| BUN-Creatinine Ratio                                                                 |                        | 408      | 157 (23, 3494)     | 162 (20, 668)         | 159 (20, 3494)    | 0.580          |
| C-Reactive Protein (if positive; mg/dL)                                              |                        | 161      | 9.7 (0.8, 57.9)    | 9.3 (3.9, 18.7)       | 9.6 (0.8, 57.9)   | 0.075          |
| Erythrocyte Sedimentation Rate (ESR) (mm/hr)                                         |                        | 20       | 12 (6, 96)         | 18 (6, 48)            | 12 (6, 96)        | 0.507          |

**Table S5. Supplemental Laboratory Findings - Urine Analysis**

|                                  | <b>N</b> | <b>No CKD n(%)</b> | <b>CKD n(%)</b> | <b>ALL</b>  | <b>p-value</b> |
|----------------------------------|----------|--------------------|-----------------|-------------|----------------|
| <b>Protein</b>                   |          | 537 (91.6%)        | 49 (8.4%)       |             |                |
| None/Trace                       | 583      | 301 (56.3%)        | 37 (77.1%)      | 338 (58.0%) | 0.005          |
| >Trace                           |          | 234 (43.7%)        | 11 (22.9%)      | 245 (42.0%) |                |
| <b>Ketones</b>                   |          |                    |                 |             |                |
| Negative                         | 583      | 499 (93.3%)        | 46 (95.8%)      | 545 (93.5%) | 0.760          |
| Positive                         |          | 36 (6.7%)          | 2 (4.2%)        | 38 (6.5%)   |                |
| <b>Urobilirubin</b>              |          |                    |                 |             |                |
| Negative                         | 583      | 534 (99.8%)        | 48 (100%)       | 582 (99.8%) | 1.000          |
| Positive                         |          | 1 (0.2%)           | 0 (0%)          | 1 (0.2%)    |                |
| <b>Bilirubin</b>                 |          |                    |                 |             |                |
| Negative                         | 583      | 528 (98.7%)        | 48 (100%)       | 576 (98.8%) | 1.000          |
| Positive                         |          | 7 (1.3%)           | 0 (0%)          | 7 (1.2%)    |                |
| <b>Nitrites</b>                  |          |                    |                 |             |                |
| Negative                         | 580      | 525 (98.7%)        | 48 (100%)       | 573 (98.8%) | 1.000          |
| Positive                         |          | 7 (1.3%)           | 0 (0%)          | 7 (1.2%)    |                |
| <b>Epithelial Cells</b>          |          |                    |                 |             |                |
| None-Few                         | 583      | 478 (89.4%)        | 44 (91.7%)      | 522 (89.5%) | 0.807          |
| >Few                             |          | 57 (10.7%)         | 4 (8.3%)        | 61 (10.5%)  |                |
| <b>Leukocytes are Aggregated</b> |          |                    |                 |             |                |
| No                               | 576      | 404 (76.5%)        | 33 (68.8%)      | 437 (75.9%) | 0.229          |
| Yes                              |          | 124 (23.5%)        | 15 (31.3%)      | 139 (24.1%) |                |
| <b>Erythrocytes</b>              |          |                    |                 |             |                |
| ≤2 per field                     | 582      | 382 (71.5%)        | 38 (79.2%)      | 420 (72.2%) | 0.258          |
| >2 per field                     |          | 152 (28.5%)        | 10 (20.8%)      | 162 (27.8%) |                |
| <b>Microalbuminuria</b>          |          |                    |                 |             |                |
| <100 mg/dl                       | 331      | 218 (71.0%)        | 22 (91.7%)      | 240 (72.5%) | 0.031          |
| ≥100 mg/dl                       |          | 89 (29.0%)         | 2 (8.3%)        | 91 (27.5%)  |                |
